# Supplementary material
Source: publisher figshare collection journal article supplement (https://tandf.figshare.com/ndownloader/files/12820202)
Supplement: Supplementary file 1 [file 12820202]

**Supporting Information**

**Three new *α*-pyrone derivatives from the plant endophytic fungus *Penicillium ochrochloronthe* and their antibacterial, antifungal and cytotoxic activities**

**Ting Zhaoa, Lu-Lin Xua, Yan Zhanga,Zheng-Hong Linb,Tao Xiae, Deng-Feng Yang d, *, Ye-Miao Chenc,*and Xiao-Long Yanga,***

a Chongqing Key Laboratory of Natural Product Synthesis and Drug Research, School of Pharmaceutical Sciences, Chongqing University, Chongqing 401331, China.

b School of Life Sciences, Chongqing University, Chongqing 401331, China.

c Institute of Pathology and Southwest Cancer Center, Southwest Hospital and Key Laboratory of Tumor Immunopathology of the Ministry of Education of China, Third Military Medical University, Chongqing 400038, China.

d State Key Laboratory of Enzyme Technology, National Engineering Research Centre of Non-food Biorefinery, Guangxi Academy of Sciences, Nanning 530007, China.

e Chongqing Beisheng Pharmachem Co., Ltd., Chongqing 400714, China.

*Correspondence: [yxl19830915@163.com](mailto:yxl19830915@163.com) (X. L. Yang), dengfengyang@163.com (D. F. Yang) or yemiaochen@126.com (Y. M. Chen); Tel.: +86-23-65678450

**List of Supporting Information**

**Figure 1.** 1H NMR spectrum of **1** (CD3OD, 400 MHz) 3

**Figure 2.** 13C NMR spectrum of **1** (CD3OD, 100 MHz) 3

**Figure 3.** 1H, 1H COSY spectrum of **1** (CD3OD) 4

**Figure 4.** HMQC spectrum of **1** (CD3OD) 4

**Figure 5.** HMBC spectrum of **1** (CD3OD) 5

**Figure 6.** IR spectrum of **1** 5

**Figure 7.** HRESIMS spectrum of **1** 6

**Figure 8**. UV spectrum of **1** 6

**Figure 9.** 1H NMR spectrum of **2** (CD3OD, 400 MHz) 7

**Figure 10**. 13C NMR spectrum of **2** (CD3OD, 100 MHz) 7

**Figure 11.** 1H, 1H COSY spectrum of **2** (CD3OD) 8

**Figure 12.** HMQC spectrum of **2** (CD3OD) 8

**Figure 13.** HMBC spectrum of **2** (CD3OD) 9

**Figure 14**. IR spectrum of **2** 9

**Figure 15.** HRESIMS spectrum of **2** 10

**Figure 16**. UV spectrum of **2** 10

**Figure 17**. 1H NMR spectrum of **3** (CD3OD, 400 MHz) 11

**Figure 18.** 13C NMR spectrum of **3** (CD3OD, 100 MHz) 11

**Figure 19**. 1H, 1H COSY spectrum of **3** (CD3OD) 12

**Figure 20**. HMQC spectrum of **3** (CD3OD) 12

**Figure 21.** HMBC spectrum of **3** (CD3OD) 13

**Figure 22**. IR spectrum of **3** 13

**Figure 23.** HRESIMS spectrum of **3** 14

**Figure 24**. UV spectrum of **3** 14

**Figure 25**. 1H NMR spectrum of **4** (CD3OD, 400 MHz) 15

**Figure 26.** 13C NMR spectrum of **4** (CD3OD, 100 MHz) 15

**Figure 27**. HRESIMS spectrum of **4** 16

**S1.** Computation Section 16

**Table S1.** Antifungal activity of compounds **1**-**4** (MIC, *μ*g/ml). 18

**Table S2.** Antibacterial activity of compounds **1**-**4** (MIC, *μ*g/ml). 19

**Table S3.** Cytotoxic activity of compounds **1**-**4** (IC50, *μ*M/ml). 19


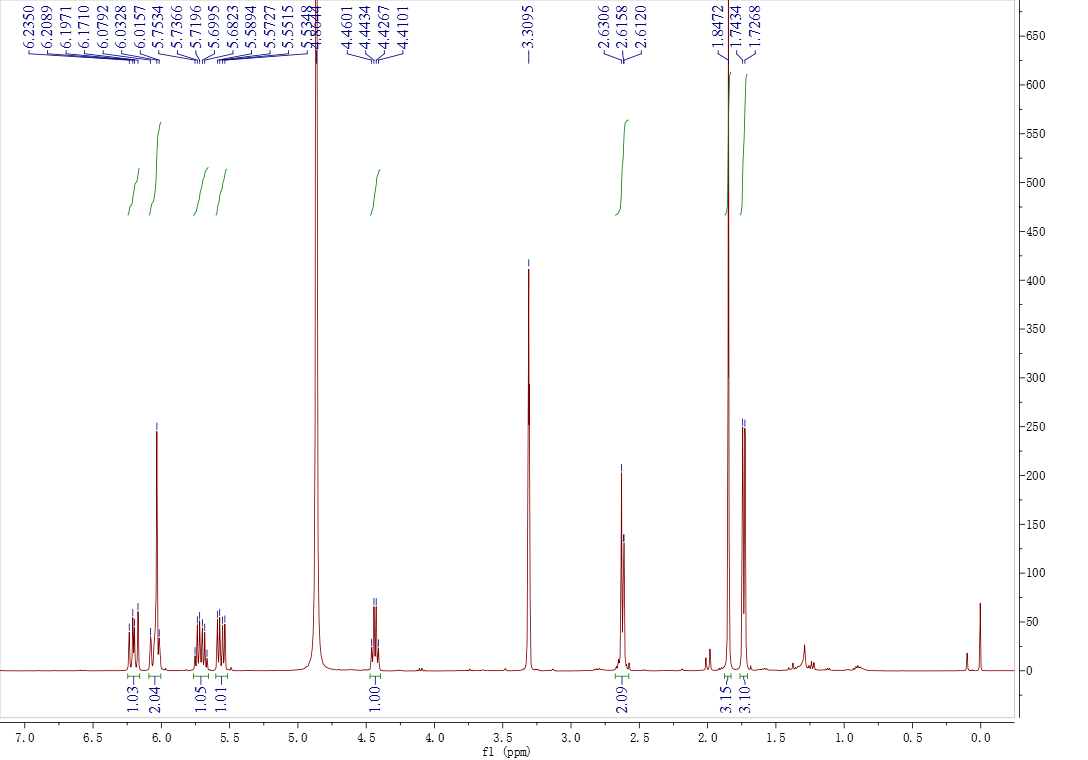


**Figure 1.** 1H NMR spectrum of **1** (CD3OD, 400 MHz)


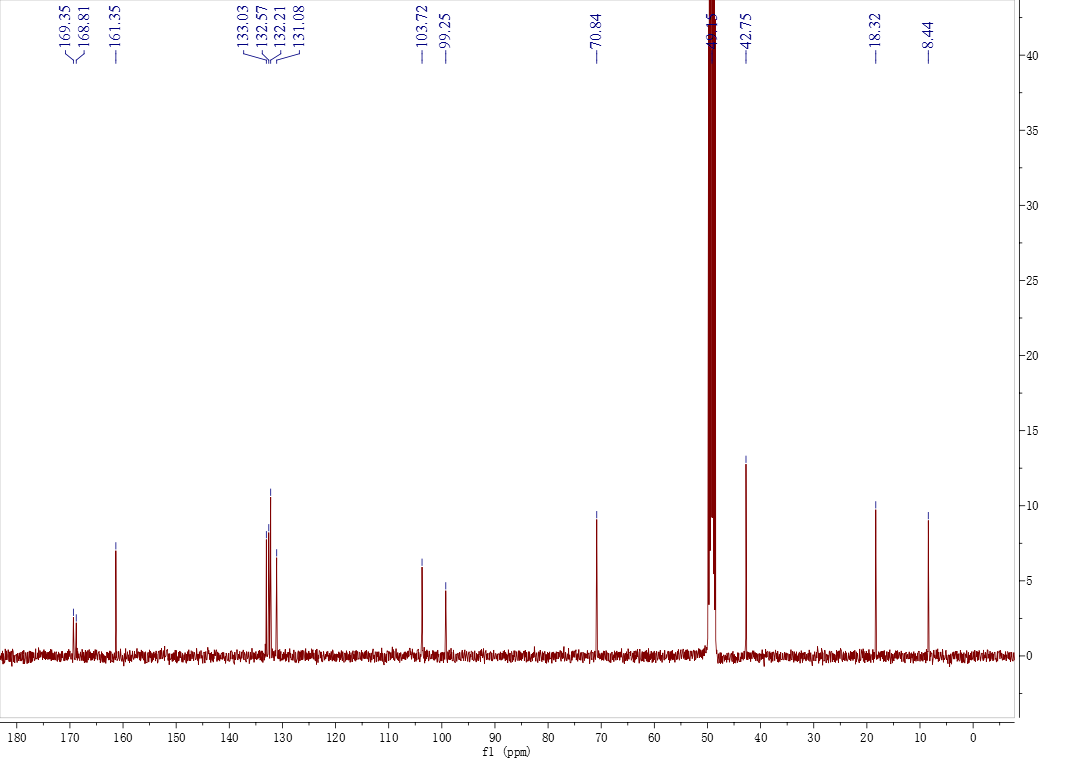


**Figure 2.** 13C NMR spectrum of **1** (CD3OD, 100 MHz)


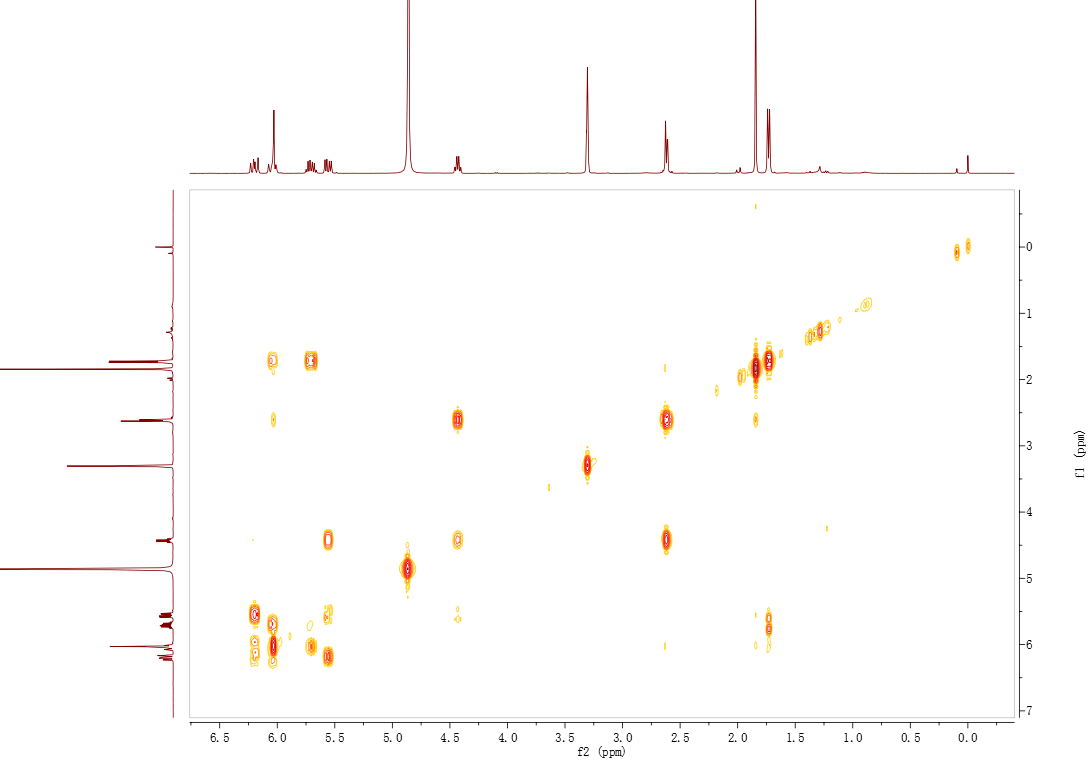


**Figure 3.** 1H, 1H COSY spectrum of **1** (CD3OD)


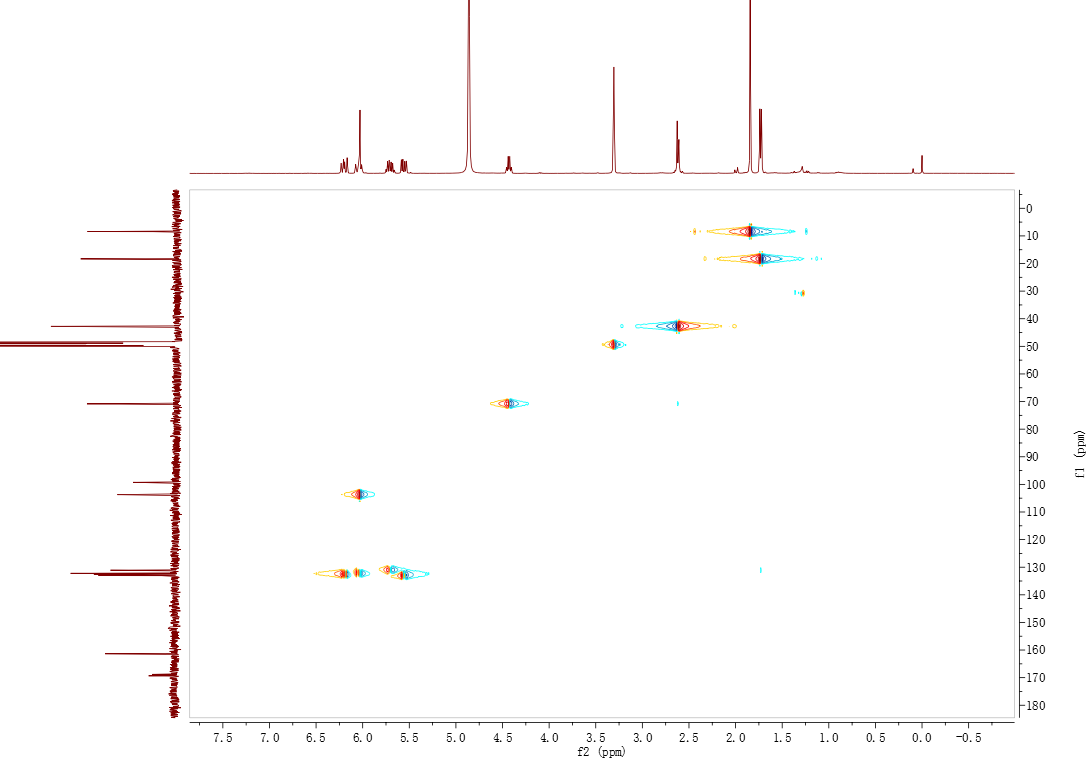


**Figure 4.** HMQC spectrum of **1** (CD3OD)


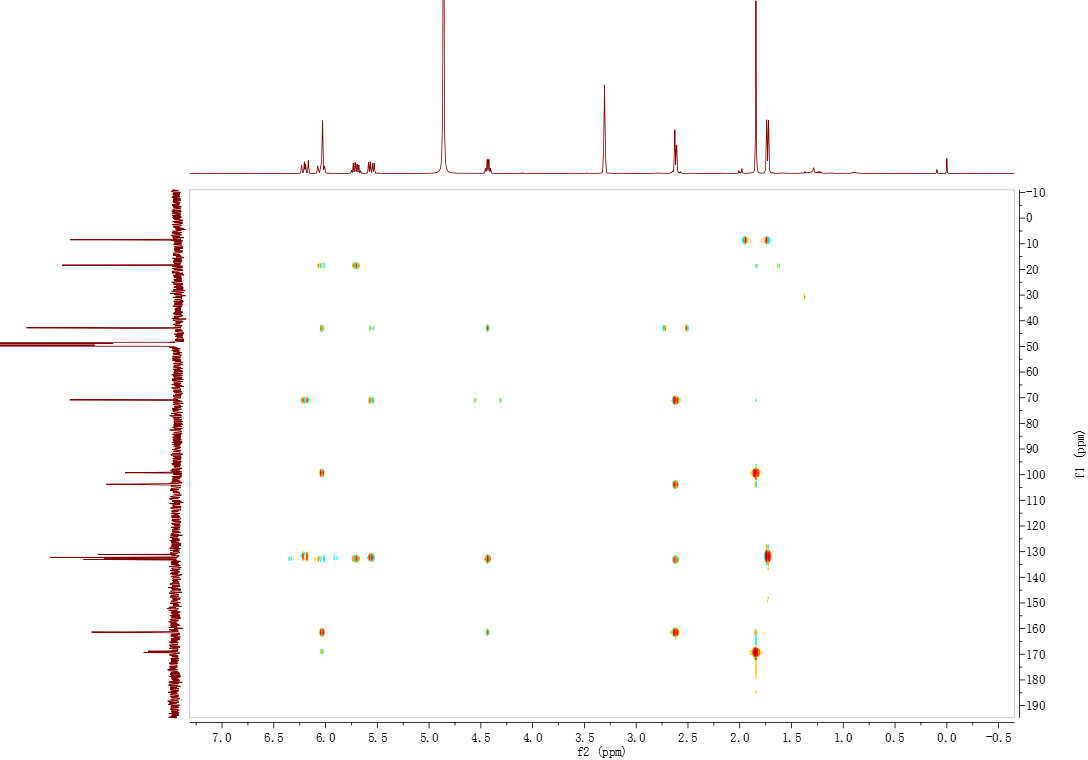


**Figure 5.** HMBC spectrum of **1** (CD3OD)


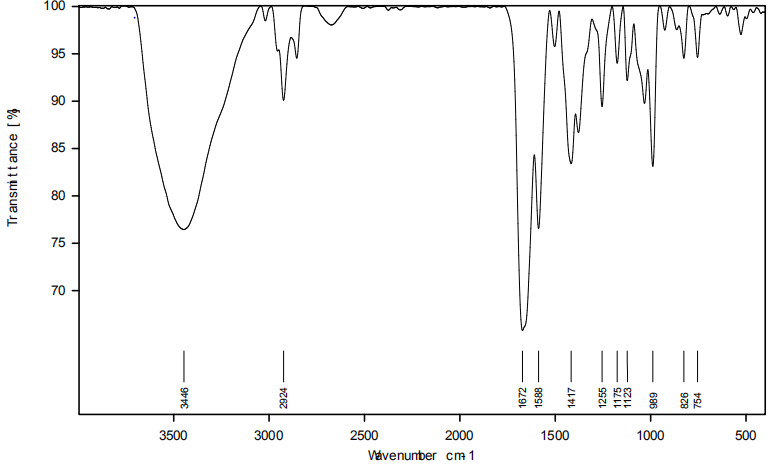


**Figure 6.** IR spectrum of **1**


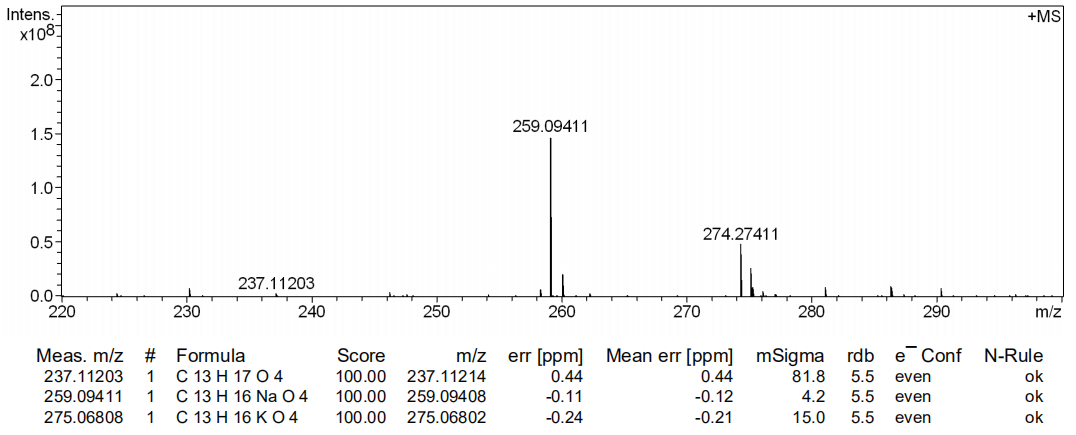


**Figure 7.** HRESIMS spectrum of **1**


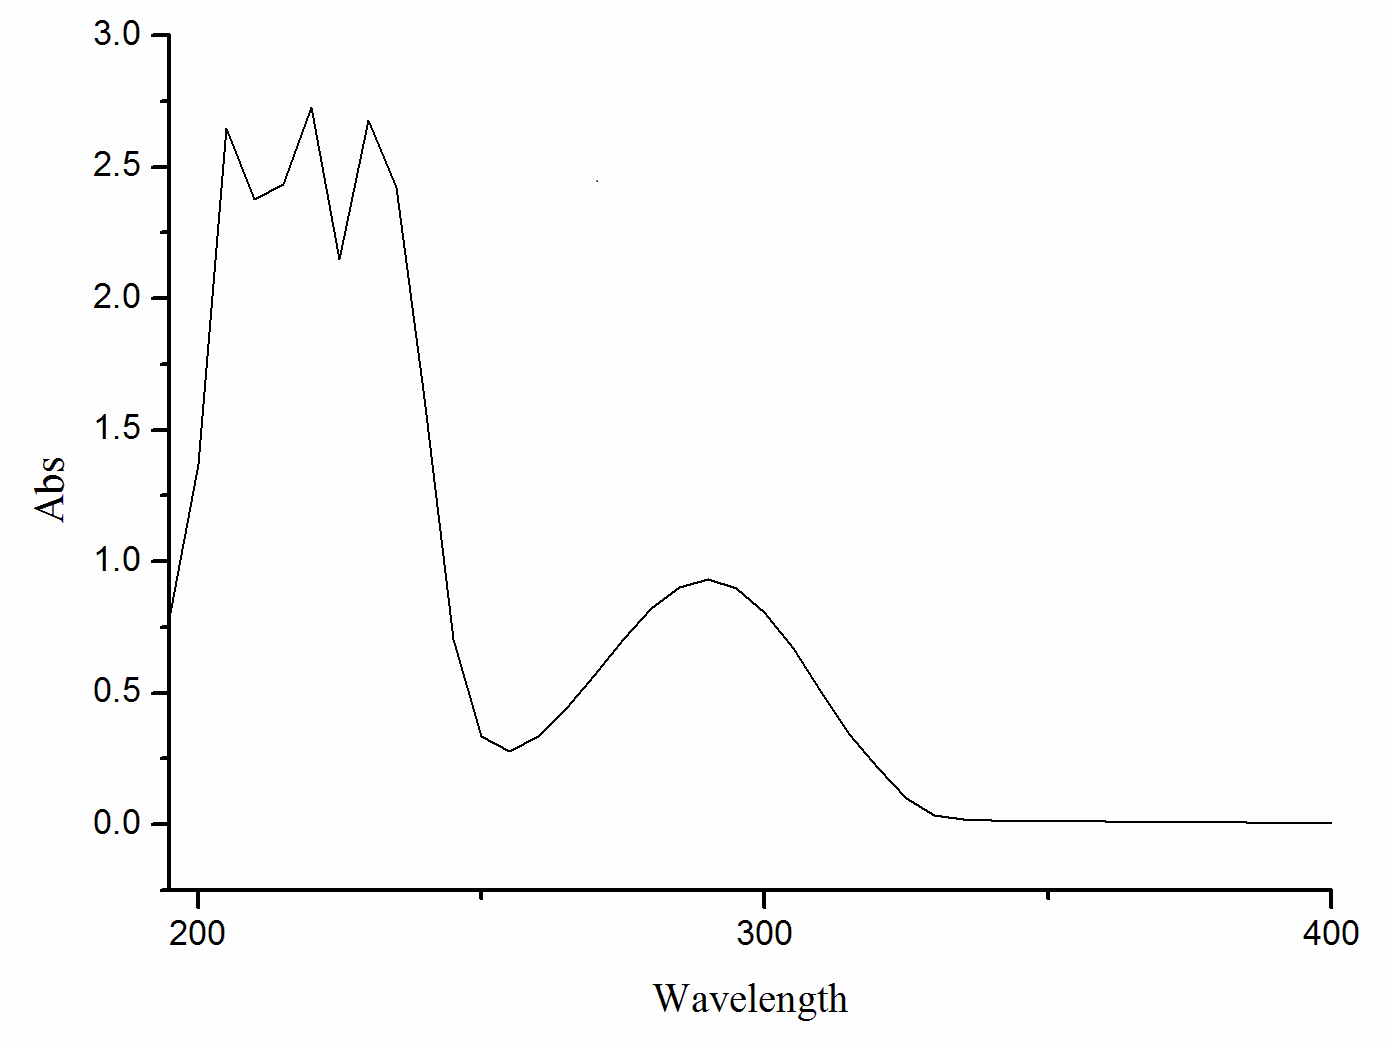


**Figure 8**. UV spectrum of **1**


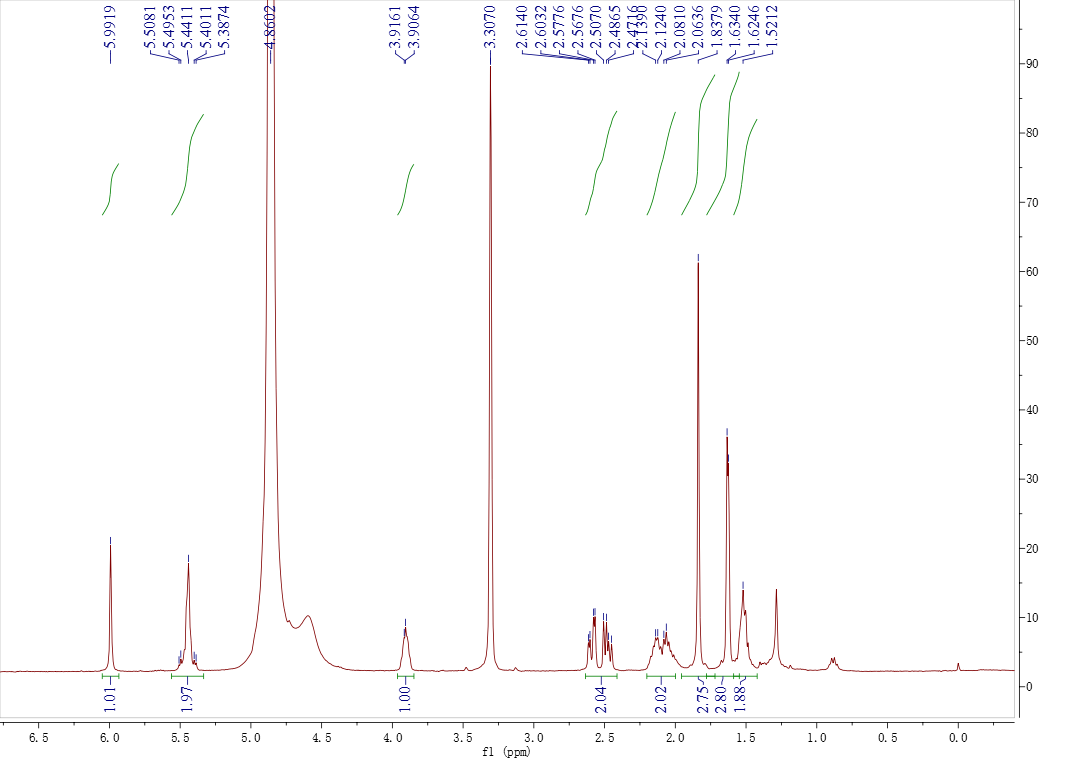


**Figure 9.** 1H NMR spectrum of **2** (CD3OD, 400 MHz)


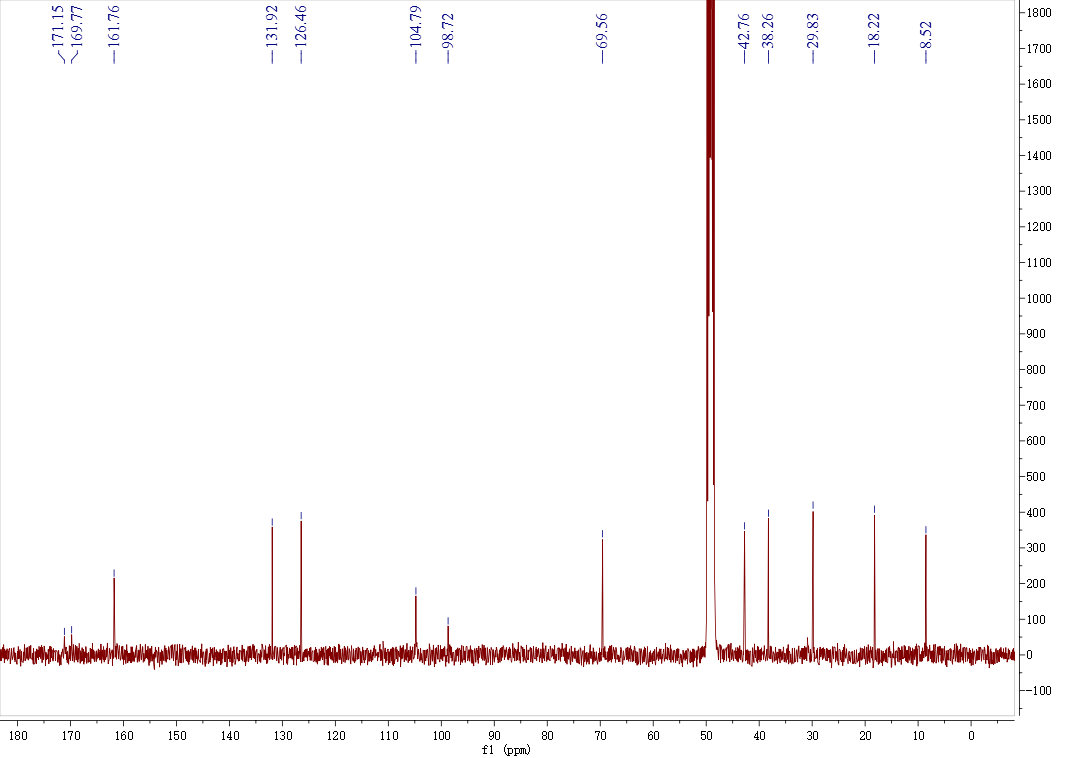


**Figure 10**. 13C NMR spectrum of **2** (CD3OD, 100 MHz)


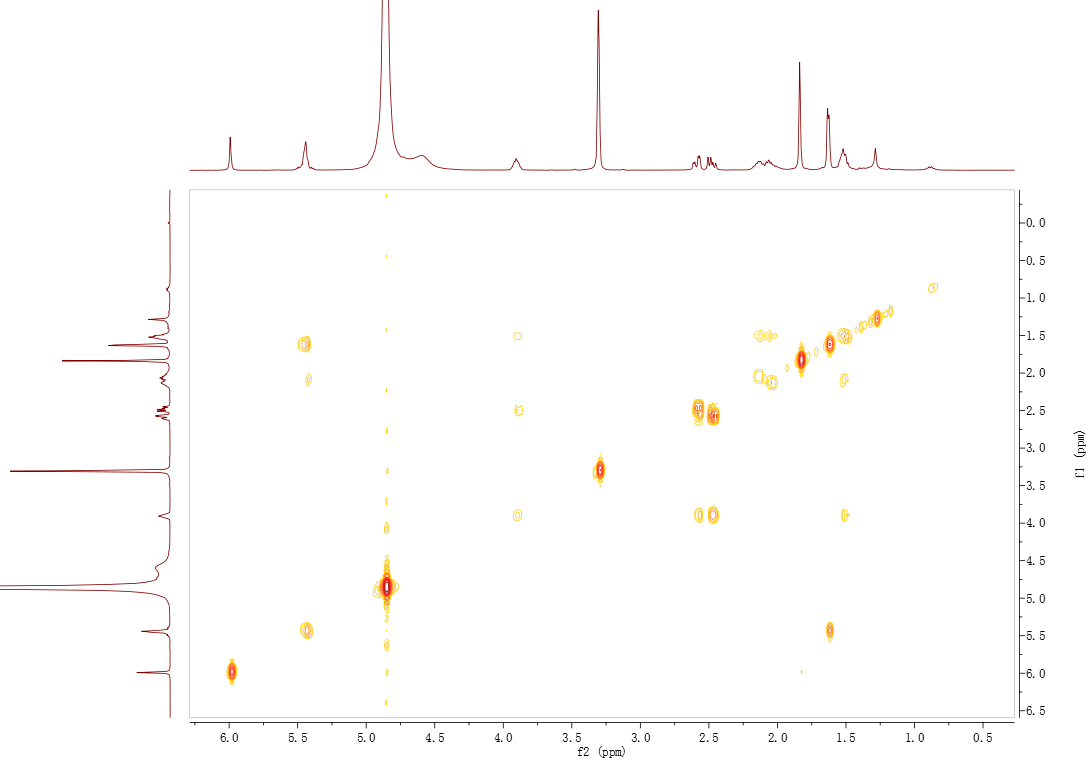


**Figure 11.** 1H, 1H COSY spectrum of **2** (CD3OD)


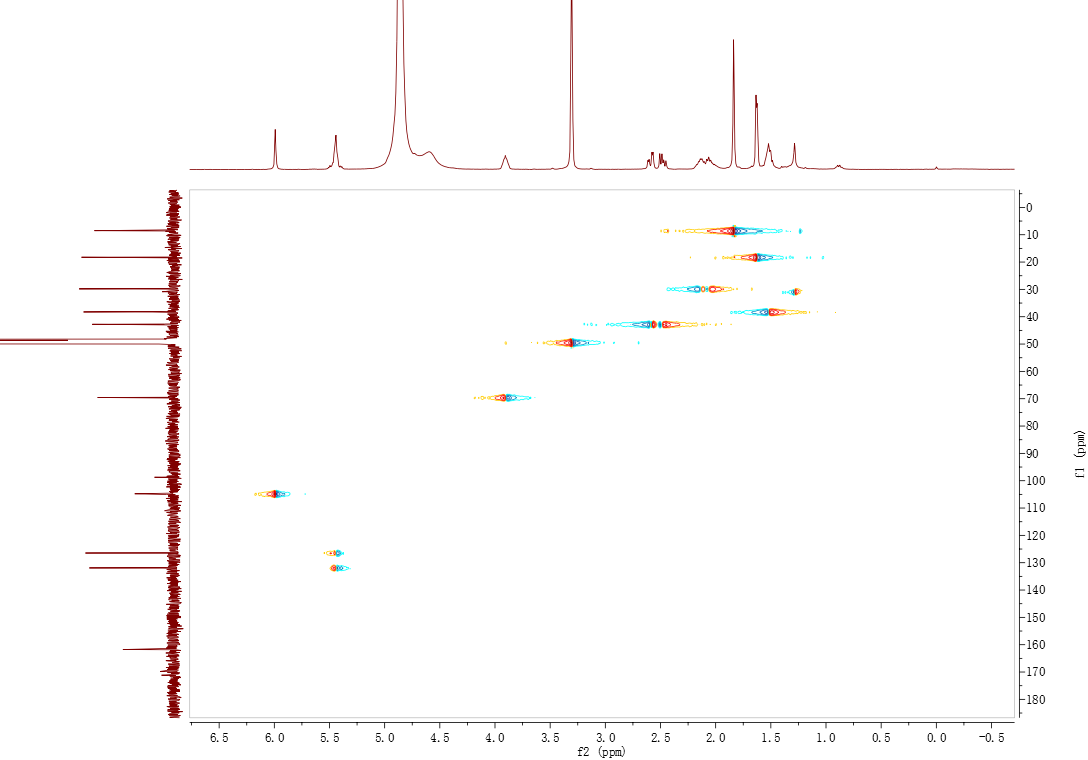


**Figure 12.** HMQC spectrum of **2** (CD3OD)


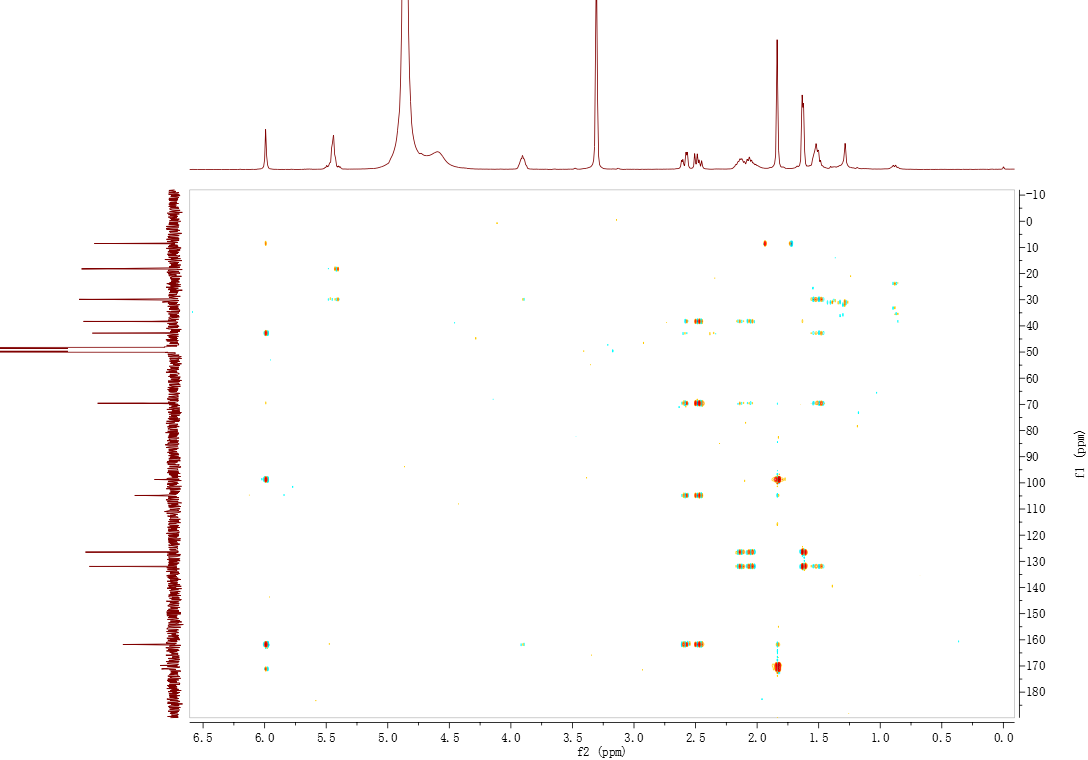


**Figure 13.** HMBC spectrum of **2** (CD3OD)


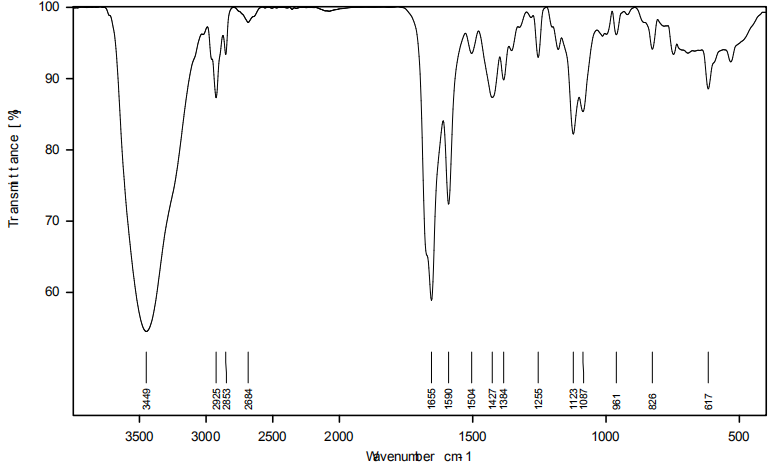


**Figure 14**. IR spectrum of **2**


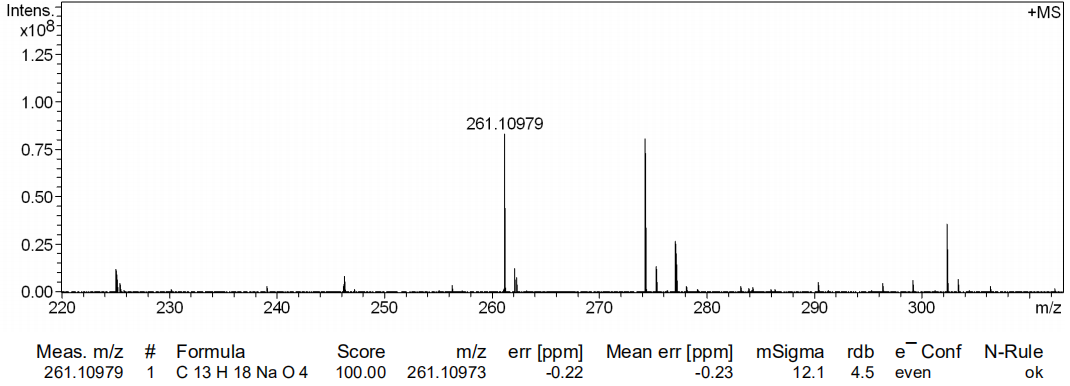


**Figure 15.** HRESIMS spectrum of **2**


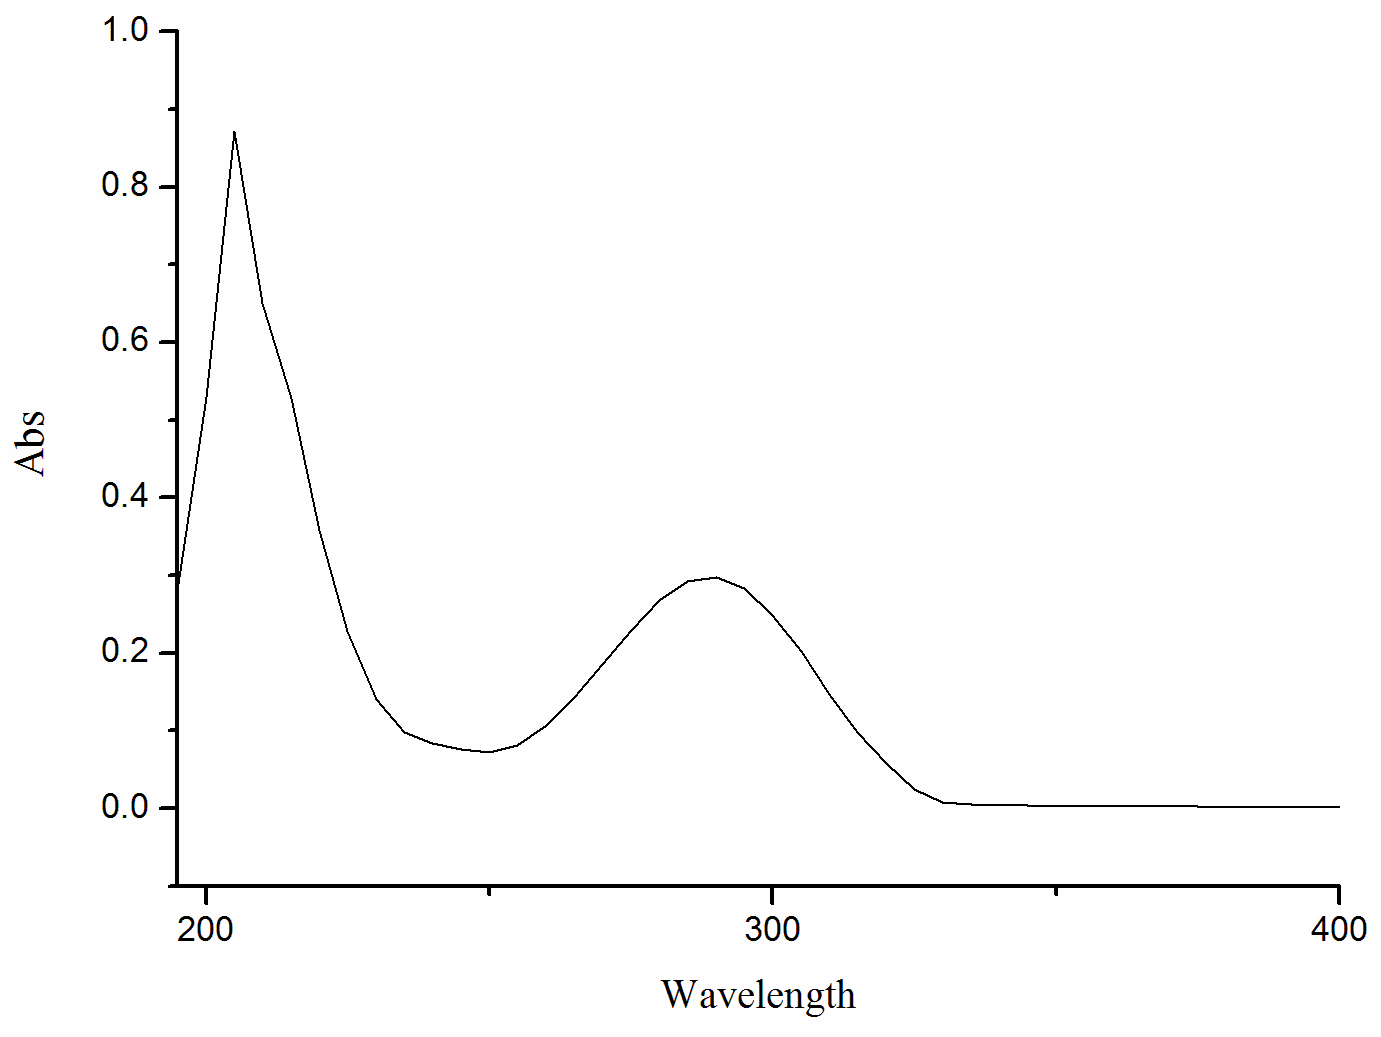


**Figure 16**. UV spectrum of **2**


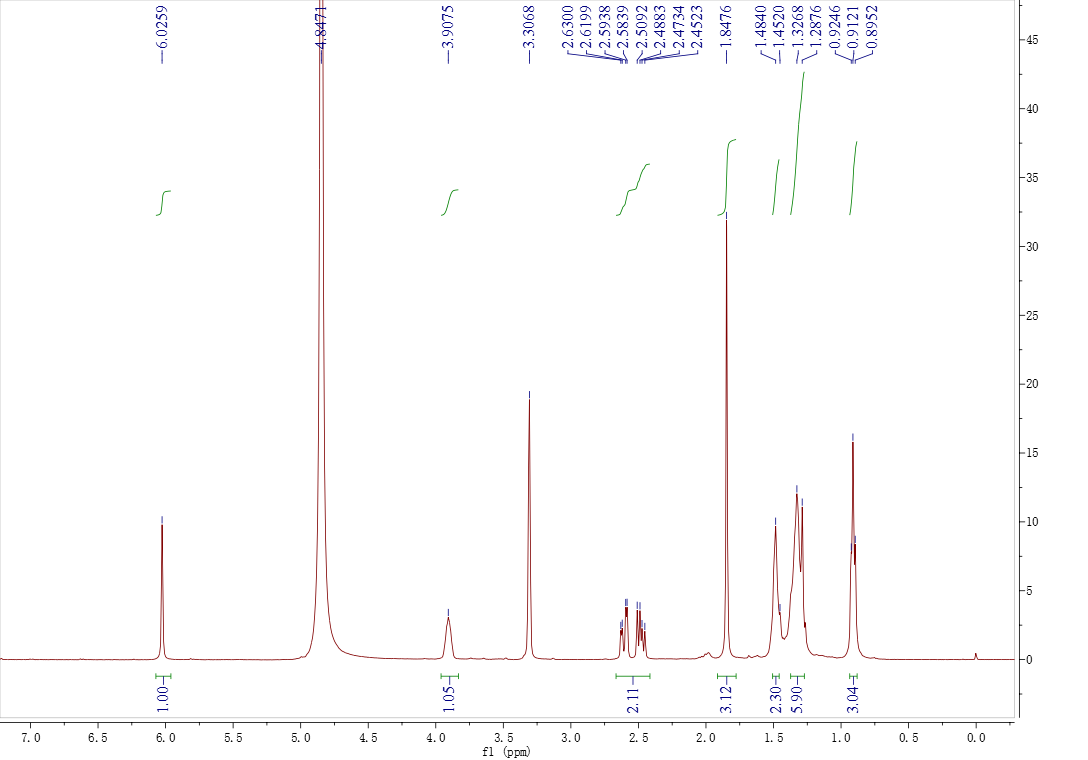


**Figure 17**. 1H NMR spectrum of **3** (CD3OD, 400 MHz)


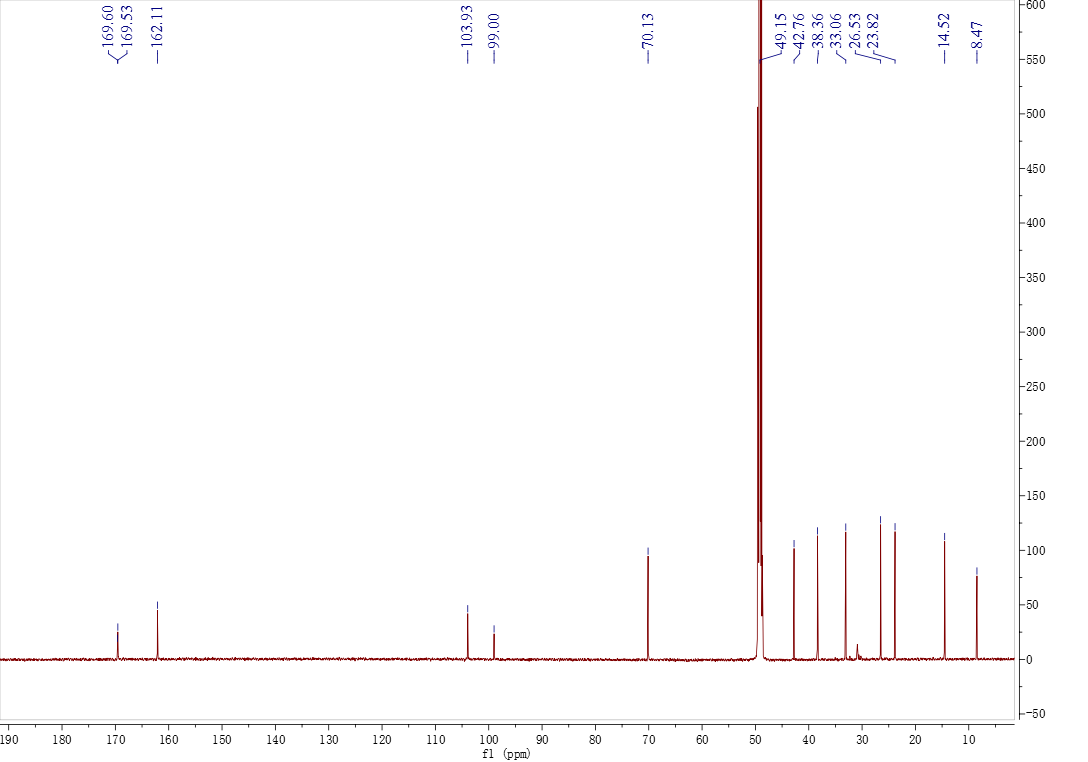


**Figure 18.** 13C NMR spectrum of **3** (CD3OD, 100 MHz)


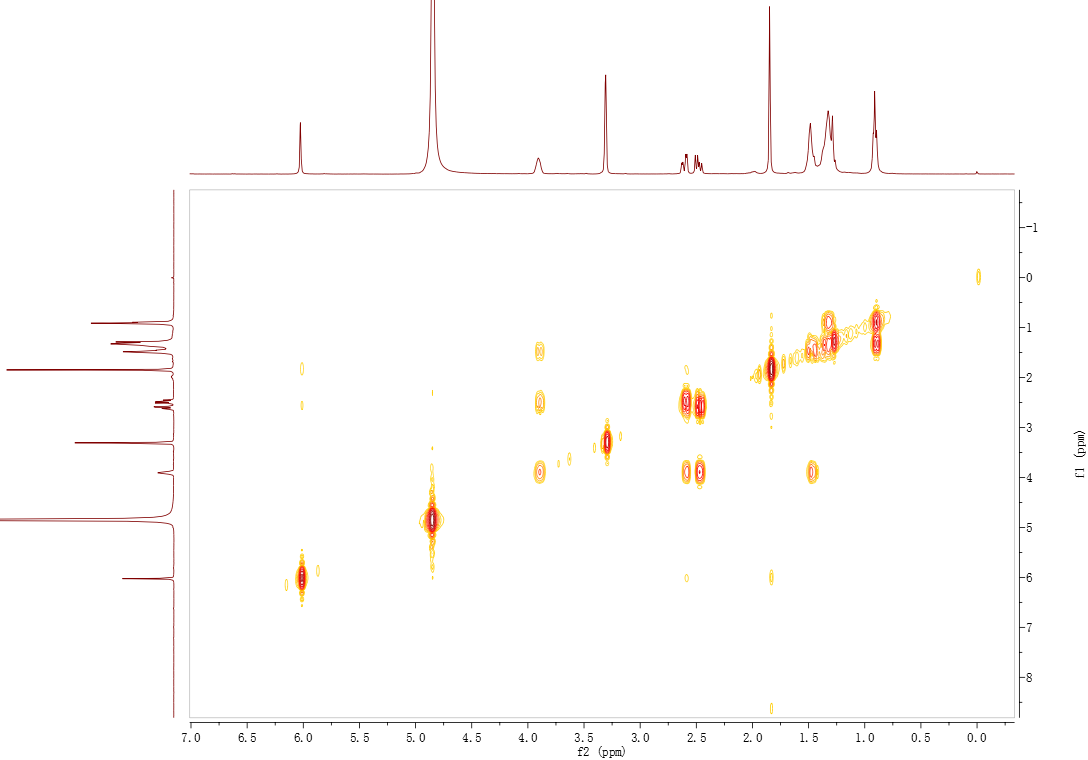


**Figure 19**. 1H, 1H COSY spectrum of **3** (CD3OD)


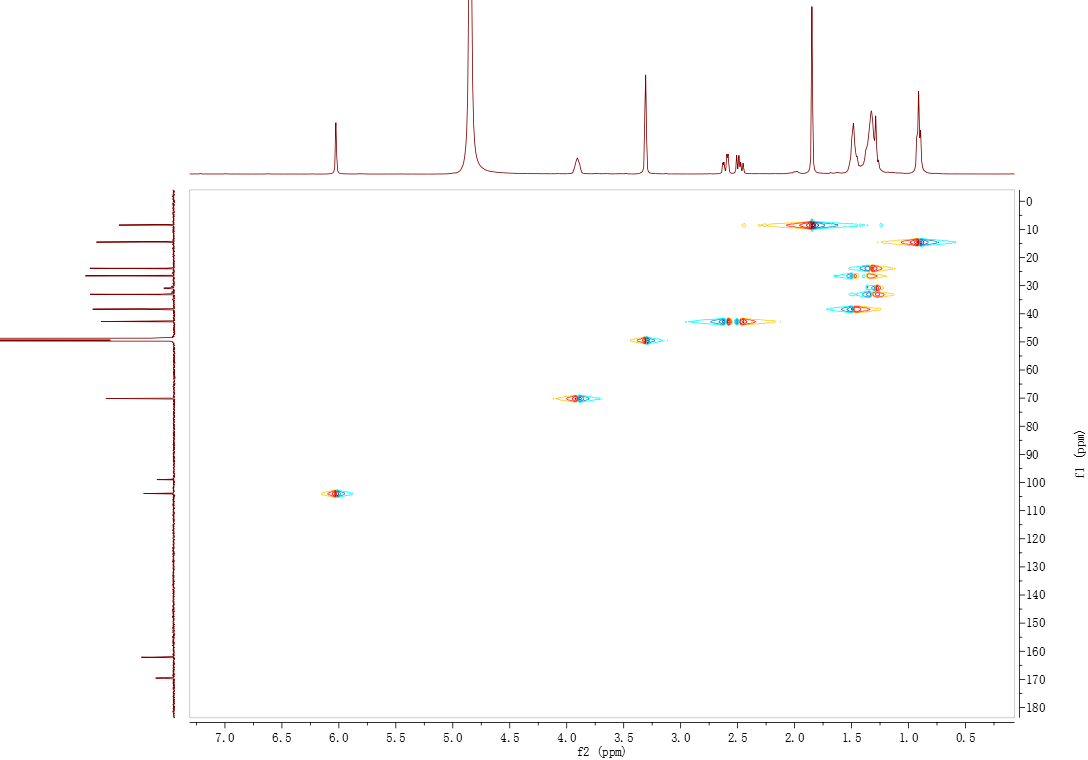


**Figure 20**. HMQC spectrum of **3** (CD3OD)


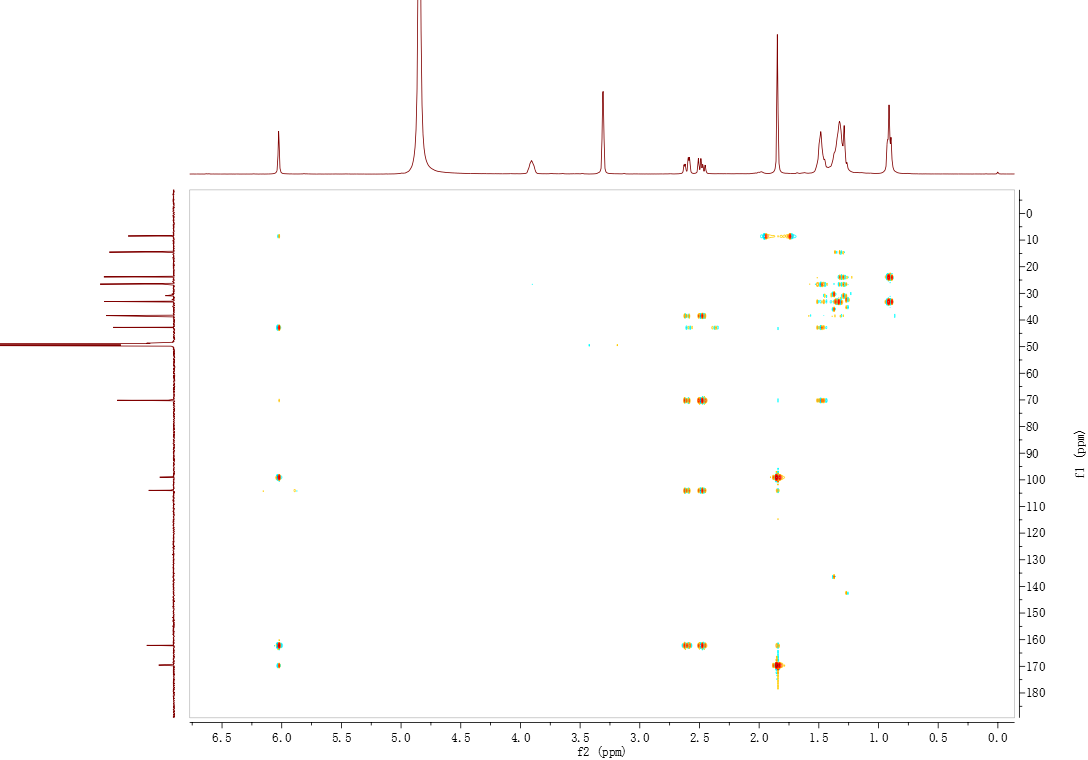


**Figure 21.** HMBC spectrum of **3** (CD3OD)


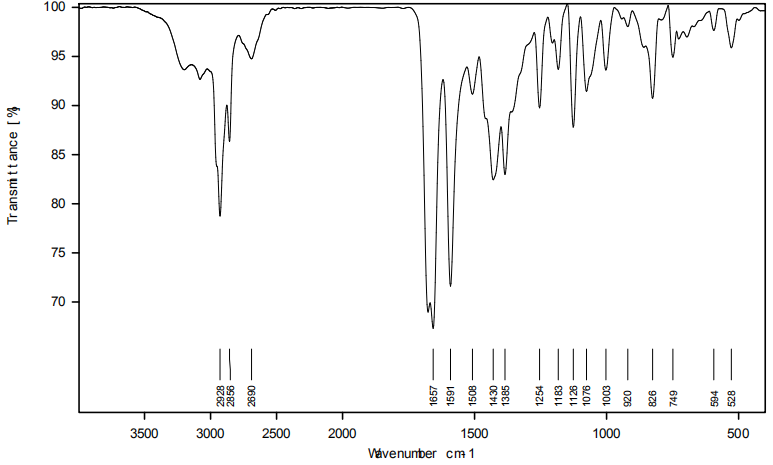


**Figure 22**. IR spectrum of **3**


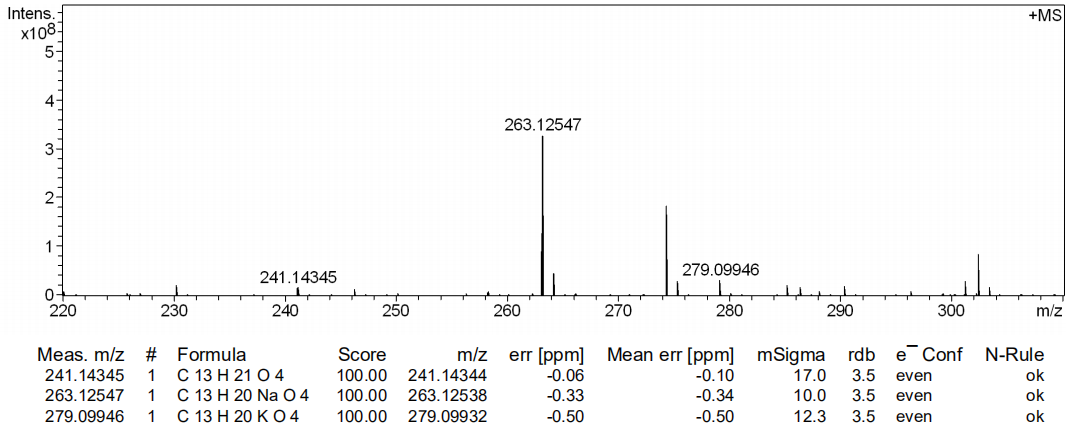


**Figure 23.** HRESIMS spectrum of **3**


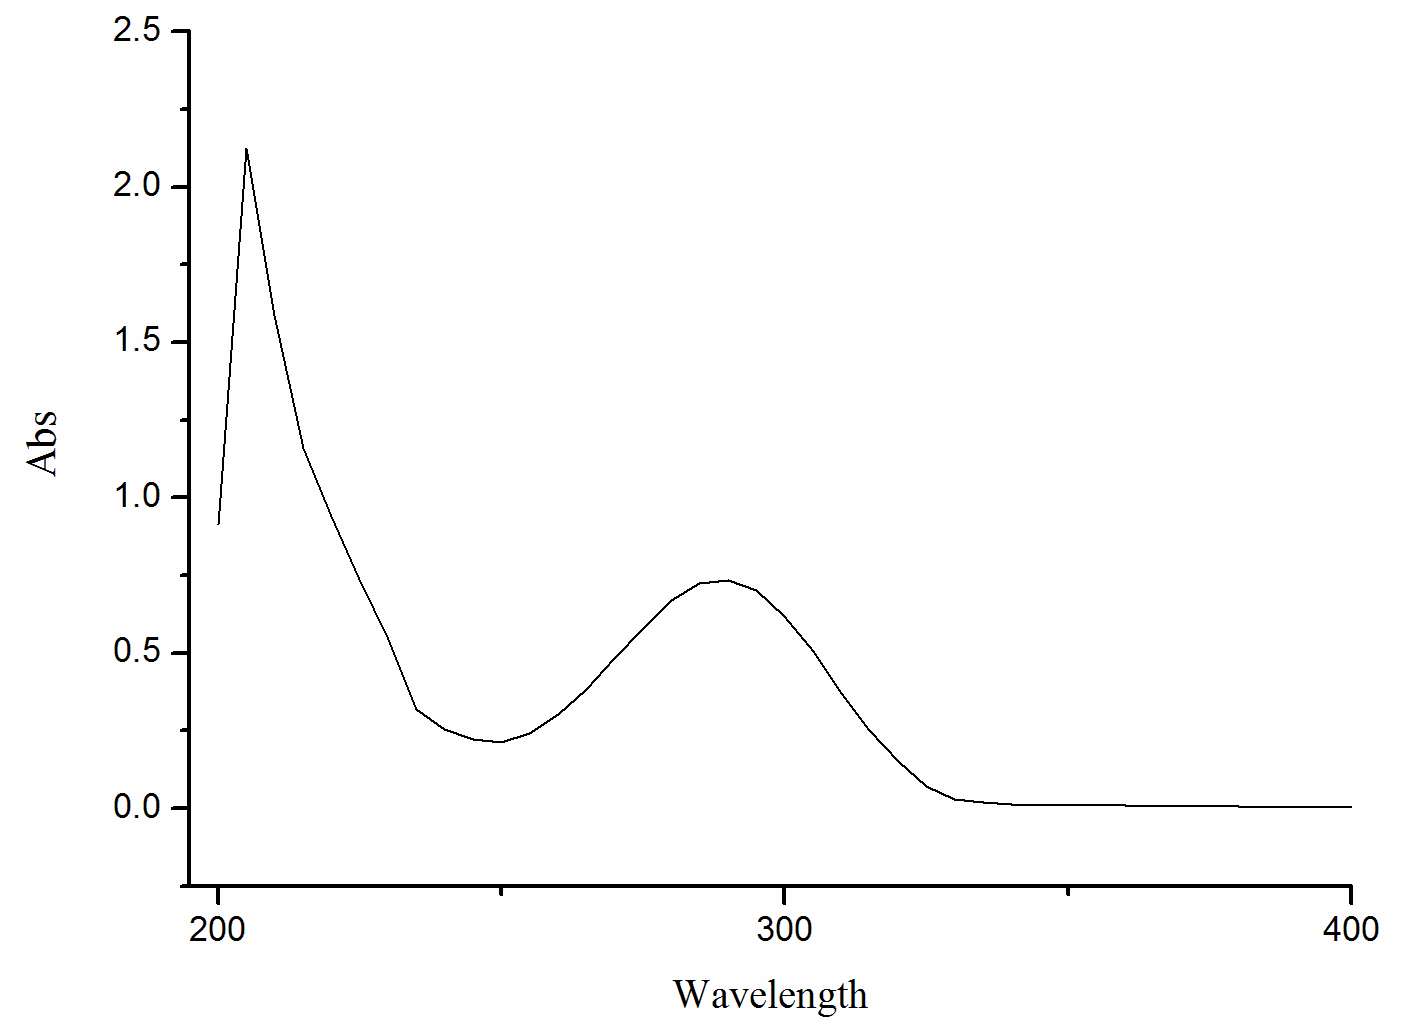


**Figure 24**. UV spectrum of **3**


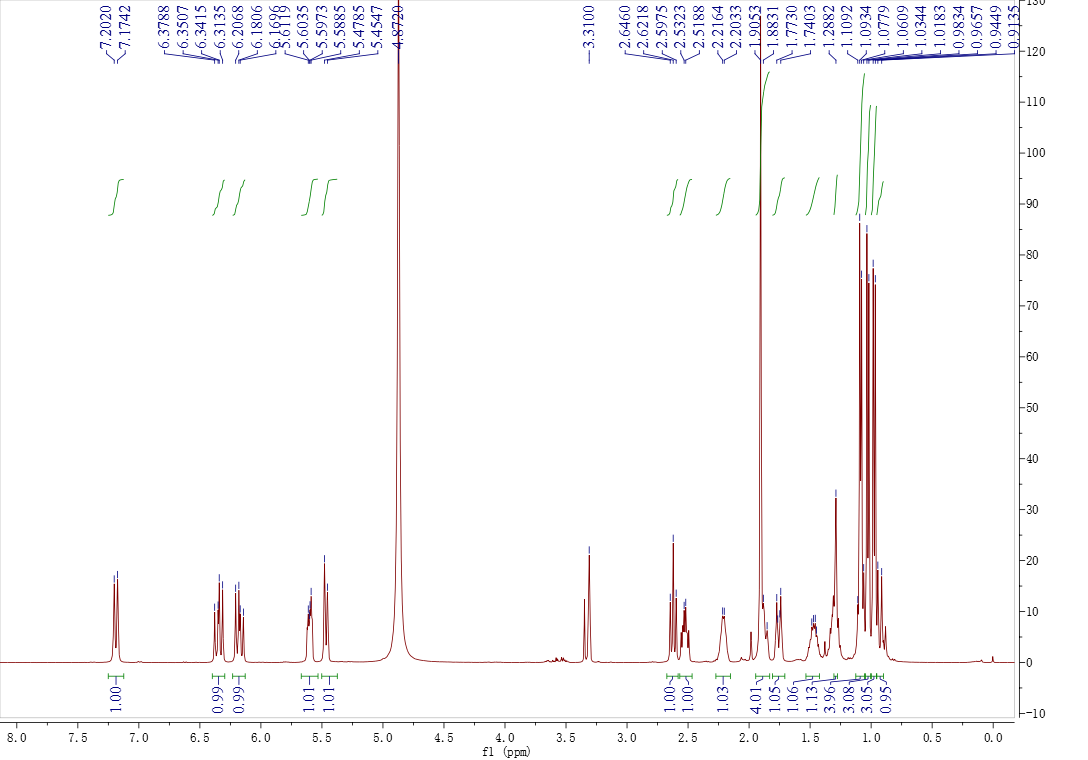


**Figure 25**. 1H NMR spectrum of **4** (CD3OD, 400 MHz)


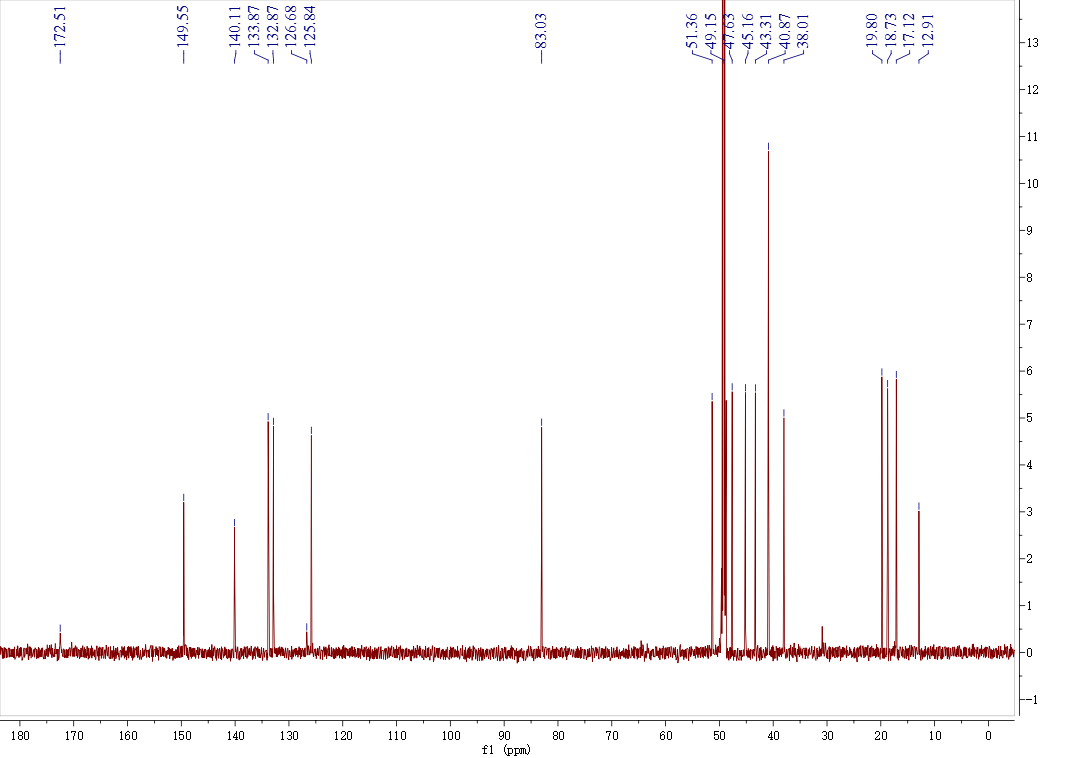


**Figure 26.** 13C NMR spectrum of **4** (CD3OD, 100 MHz)


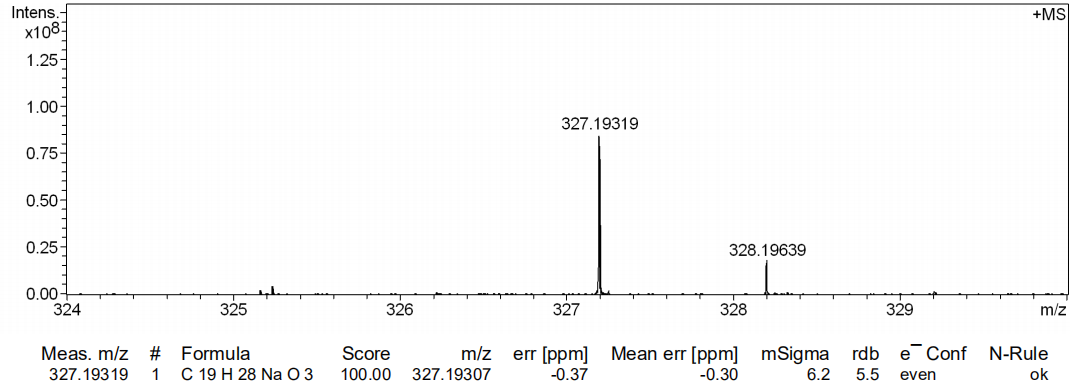


**Figure 27**. HRESIMS spectrum of **4**

**S1. Computation Section**

Conformation searches based on molecular mechanics with MMFF94s force field were performed for (2′*R*)-**1** and (2′*S*)-**1** gave 20 and 20 conformers with populations higher than 1%.[1] All these conformers were further optimized by the density functional theory method at the B3LYP/6-311+G(d) level in Gaussian 09 program package.[2] These conformers were subjected to theoretical calculation of ECD using time-dependent density functional theory (TDDFT) at CAM- B3LYP/6-311+G (d,p) level in gas phase. The calculated ECD curves for (4′*R*)-**1** and (4′*S*)-**1** and weighted ECD were all generated using SpecDis 1.60 [3]with σ = 0.3 eV, and UV shift -1 nm. As shown in Figure 1S, the calculated ECD spectrum of (4′*R*)-**1** matched well with the experimental one, suggesting the absolute configuration of **1** to be 2′*R*.

**References**:

[1] (a) H. Goto, E. Osawa, *Journal of the American Chemical Society.* **1989**, *111*, 8950-8951; (b) H. Gotō, E. Ōsawa, *Journal of the Chemical Society, Perkin Transactions 2.* **1993**, *2*, 187-198.

[2] M. J. T. G. W. Frisch, H. B. Schlegel, G. E. Scuseria, M. A. Robb, J. R. Cheeseman, G. Scalmani, V. Barone, B. Mennucci, G. A. Petersson, H. Nakatsuji, M. Caricato, X. Li,H. P. Hratchian, A. F. Izmaylov, J. Bloino, G. Zheng, J. L. Sonnenberg, M. Hada, M. Ehara, K. Toyota, R. Fukuda, J. Hasegawa, M. Ishida, T. Nakajima, Y. Honda, O. Kitao, H. Nakai, T. Vreven, J. A. Montgomery, J. E. Peralta, F. Ogliaro, M. Bearpark, J. J. Heyd, E. Brothers, K. N. Kudin, V. N. Staroverov, T. Keith, R. Kobayashi, J. Normand, K. Raghavachari, A. Rendell, J. C. Burant, S. S. Iyengar, J. Tomasi, M. Cossi, N. Rega, J. M. Millam, M. Klene, J. E. Knox, J. B. Cross, V. Bakken, C. Adamo, J. Jaramillo, R. Gomperts, R. E. Stratmann, O. Yazyev, A. J. Austin, R. Cammi, C. Pomelli, J. W. Ochterski, R. L. Martin, K. Morokuma, V. G. Zakrzewski, G. A. Voth, P. Salvador, J. J. Dannenberg, S. Dapprich, A. D. Daniels, O. Farkas, J. B. Foresman, J. V. Ortiz, J, Cioslowski, and D. J. Fox, *Gaussian 09, revision B. 01. Gaussian, Inc., Wallingford CT:* **2010**.

[3] T. Bruhn, A. Schaumlöffel, Y. Hemberger, G. S. Bringmann, *Version 1.60*; University of Wuerzburg: Germany, 2012. *There is no corresponding record for this reference*.

**Table S1.** Antifungal activity of compounds **1**-**4** (MIC, *μ*g/mL).

| Strain | **1** | **2** | **3** | **4** | Ketoconazole |
| --- | --- | --- | --- | --- | --- |
| *Cercospora arachidicola Hori* | 12.5 | 12.5 | 25 | 12.5 | 0.78 |
| *Alternaria solani* | 12.5 | 25 | 12.5 | 25 | 0.78 |
| *Bipolaris carbonum Wilson* | 25 | 25 | 25 | 12.5 | 0.78 |
| *Fusarium graminearum* | 12.5 | 12.5 | 50 | 12.5 | 0.78 |
| *Cylindrocladium parasiticum* | 25 | 25 | 12.5 | 50 | 0.78 |
| *Alternaria alternata f. sp. mali* | 25 | 50 | 12.5 | 25 | 0.78 |
| *Cercospora personata* | 25 | 25 | 50 | 25 | 0.78 |
| *Botrytis cinerea Pers.* | 25 | 50 | 25 | 50 | 1.5625 |
| *Ustilago scitaminea Syd.* | 25 | 25 | 50 | 50 | 1.5625 |
| *Rhizoctonia cerealis* | 50 | 50 | 25 | 50 | 0.78 |
| *Helminthosporium maydis* | 50 | 50 | 50 | 25 | 0.78 |
| *Colletotrichum orbiculare* | 50 | 50 | 50 | 25 | 0.78 |
| *Ascochyta gossypii Syd．* | 50 | 50 | 50 | 25 | 1.5625 |
| *Alteraria alternata (Fries) Keissler* | 50 | 50 | 50 | 50 | 6.25 |
| *Colletortrichum gloeosporiodes* | 25 | 100 | 50 | 25 | 0.78 |
| *Colletotrichum graminicola* | 100 | 25 | 25 | 50 | 3.125 |
| *Botrytis fabiopsis* | 50 | 50 | 100 | 50 | 3.125 |
| *Alternaria brassicae* | 50 | >100 | >100 | 50 | 3.125 |
| *Sclerotinia sclerotiorum* | 25 | 100 | >100 | 100 | 3.125 |
| *Exserohilum turcicum* | 100 | >100 | >100 | 50 | 1.5625 |

**Table S2.** Antibacterial activity of compounds **1**-**4** (MIC, *μg*/ml).

| Strain | **1** | **2** | **3** | **4** | Ciprofloxacin |
| --- | --- | --- | --- | --- | --- |
| *Bacillus subtilis* | 50 | 50 | 50 | 25 | 1.5625 |
| *Micrococcus luteus* | 50 | 50 | 50 | 50 | 6.25 |
| *Staphyloccocus aureus* | 50 | 50 | 50 | 50 | 3.125 |
| *Bacillus megaterium* | 50 | 50 | 50 | 25 | 0.78 |
| *Salmonella enterica* | 50 | 50 | 50 | 25 | 6.25 |
| *Proteusbacillm vulgaris* | 50 | 50 | 50 | 25 | 0.78 |
| *Salmonella typhi* | 50 | 25 | 50 | 25 | 3.125 |
| *Psmdomonas aeruginosa* | 50 | 50 | 50 | 50 | 3.125 |
| *Escherichia coli* | 50 | 50 | 50 | 50 | 0.78 |
| *Enterobacter aerogenes* | 50 | 100 | 50 | 50 | 0.78 |

**Table 4.** Cytotoxic activity of compounds **1**-**4** (IC50, *μM*/ml).

| Cell line | **1** | **2** | **3** | **4** | Sorafenib |
| --- | --- | --- | --- | --- | --- |
| A549 | >100 | >100 | >100 | 51.45 | 0.42 |
| Huh7 | >100 | >100 | >100 | >100 | 1.15 |
| LN229 | >100 | >100 | >100 | 23.43 | 0.43 |
| MGC | >100 | >100 | >100 | 39.16 | 1.50 |
| MHCC97H | >100 | >100 | >100 | >100 | 2.44 |
| LOVO | >100 | >100 | >100 | 46.97 | 0.32 |
| MDA231 | >100 | >100 | >100 | 42.85 | 0.31 |
